# Supplementary material
Source: Springer Nature journal article supplement (https://www.springermedizin.de/resource/supplementary/12930_2012_52_MOESM2_ESM.pdf/9424646)

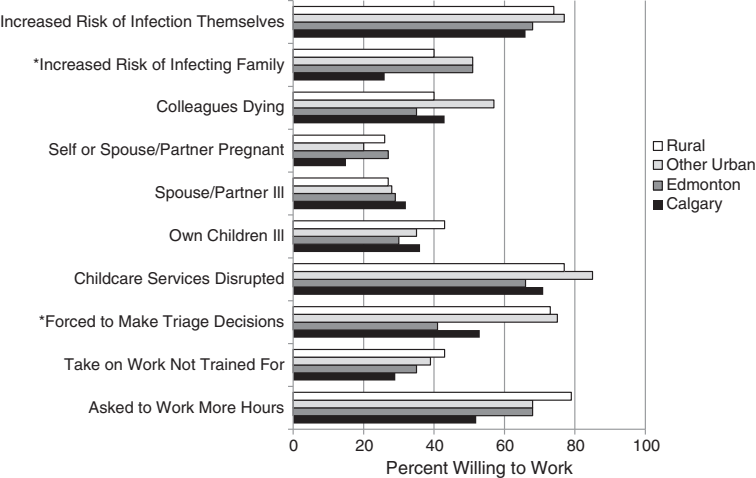

Supplement: MOESM2 [file 9424646]
